# Supplementary material for: Alcohol-Related Elevation of Liver Transaminase Is Associated With Gut Microbiota in Male
Source: Front Med (Lausanne). 2022 Feb 22;9:823898. doi: 10.3389/fmed.2022.823898 (PMC8904186; doi:10.3389/fmed.2022.823898)
Supplement: Supplementary Table 1 — Statistically differential species and metabolic pathways related to the drinking case group. [file Table_1.XLSX]

## Sheet: Sheet1
feature	P(Drinking_controlVSDrinking_case)	Enrich(Drinking_controlVSDrinking_case)	P(Drinking_caseVSNon_drinking_control)	Enrich(Drinking_caseVSNon_drinking_control)	P(Drinking_caseVSNon_drinking_case)	Enrich(Drinking_caseVSNon_drinking_case)	P(Drinking_controlVSNon_drinking_control)	P(Drinking_controlVSNon_drinking_case)	P(Non_drinking_controlVSNon_drinking_case)
Faecalibacterium_prausnitzii	0.0224646	Drinking_control	0.0126356	Non_drinking_control	0.0431413	Non_drinking_case	0.106043	0.163868	0.441302
Roseburia_hominis	0.0242653	Drinking_control	0.0401886	Non_drinking_control	0.0105659	Non_drinking_case	0.477035	0.238301	0.19004
GLCMANNANAUT_PWY	0.000449639	Drinking_case	0.0155911	Drinking_case	0.0142799	Drinking_case	0.134133	0.328212	0.328639
PWY_7197	0.000928884	Drinking_case	0.0101677	Drinking_case	0.00799391	Drinking_case	0.44655	0.224748	0.211437
NONOXIPENT_PWY	0.00143852	Drinking_case	0.0117621	Drinking_case	0.0142799	Drinking_case	0.173433	0.473399	0.247699
PWY_7208	0.00149083	Drinking_case	0.00395529	Drinking_case	0.00684645	Drinking_case	0.406417	0.163868	0.211437
PWY_7371	0.00207163	Drinking_case	0.00806781	Drinking_case	0.0196829	Drinking_case	0.396347	0.319961	0.346026
PWY_5188	0.00604708	Drinking_case	0.0402886	Drinking_case	0.0240898	Drinking_case	0.381797	0.218137	0.163039
GALACT_GLUCUROCAT_PWY	0.00979637	Drinking_control	0.0204119	Non_drinking_control	0.0431413	Non_drinking_case	0.416376	0.252295	0.328639
GLUCUROCAT_PWY	0.0116552	Drinking_control	0.0281074	Non_drinking_control	0.0480563	Non_drinking_case	0.436448	0.304471	0.464697
GALACTUROCAT_PWY	0.013431	Drinking_control	0.0217929	Non_drinking_control	0.0344764	Non_drinking_case	0.348138	0.18681	0.30747
PWY0_1296	0.0146049	Drinking_case	0.0317816	Drinking_case	0.0431413	Drinking_case	0.492342	0.360963	0.35036
PWY_7228	0.0328147	Drinking_case	0.00196287	Drinking_case	0.0306867	Drinking_case	0.103718	0.153114	0.464697
FERMENTATION_PWY	0.0426791	Drinking_control	0.00944193	Non_drinking_control	0.0212428	Non_drinking_case	0.230893	0.274068	0.488223
